# Supplementary material
Source: publisher figshare collection journal article supplement (https://acs.figshare.com/ndownloader/files/4715473)
Supplement: Supplementary file 1 [file 4715473]

# Polymerization at the alkylthiolate-Au(111) interface

Henrik Grönbeck and Hannu Häkkinen

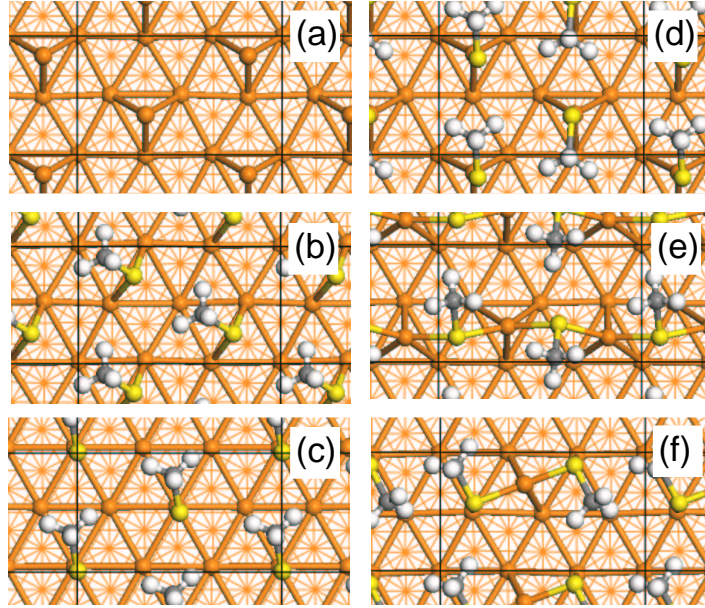

FIG. 1: Structural models for systems of different adsorbates on Au(111) discussed in the paper. (a) Au ad-atoms in fcc position, (b) MeS adsorbed in bridge-fcc, (c) MeS adsorbed atop, (d) MeSAu adsorbed in fcc, (e)  $(\text{MeSAu})_x$  and (f) MeS-Au-SMe complex. Black line indicates surface cell. Color code: Orange (Au), yellow (S), grey (C) white (H).

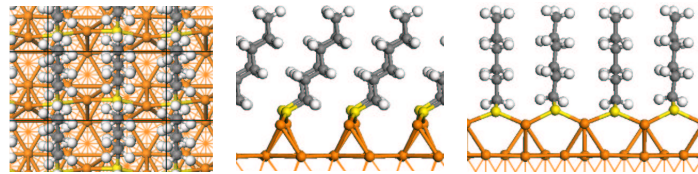

FIG. 2: Top and side views of hexylthiolate in the  $(\text{RSAu})_x$  configuration. Black line indicates surface cell. Color code as in Figure 1.
